# Supplementary material
Source: publisher figshare collection journal article supplement (https://sage.figshare.com/ndownloader/files/15651674)
Supplement: Supplementary file 1 [file 15651674]

# Appendix A

## Definitions

**HOMELESSNESS** is defined as having 'no fixed place to stay' for at least the past 7 nights and little likelihood of getting a place in the upcoming month. 'No fixed place to stay' means living rough in a public or private place not ordinarily used as a regular sleeping accommodation for a human being (e.g. outside, on the streets, in parks or on the beach, in doorways, in parked vehicles, squats, or parking garages), as well as those whose primary night-time residence is a supervised public or private emergency accommodation (e.g., shelter, hostel). Those currently being discharged from an institution, prison, jail or hospital with no accommodation, as well as those who are temporarily staying with a friend without paying rent also qualify as Homeless.

**PRECARIOUS HOUSING** is defined as having a Single Room Occupancy (SRO), rooming house, transitional or supportive housing or hotel/motel as a primary residence, or temporarily staying with a friend while paying rent.

## Witness Declaration

The consent form is written in accessible, plain language and is read aloud and explained to all survey participants, regardless of literacy level. For participants who are unable to write, consent will be given orally and a witness will be present during the entire process to ensure that all aspects of the consent process are understood and that consent is given freely. The witness will be someone who does not work on this study, and someone that the participant agrees can be there.

## Language Accommodation

During recruitment and interview scheduling, the participant's conversational English is assessed, and if needed, support from a professional, certified interpreter competent in the required language is accessed.

## Appendix B

Gender and year of birth range of the control and intervention groups in the quantitative sample (n=184).

|                  | Control<br>(n=92) | Intervention<br>(n=92) | Total<br>(n=184)  |
|------------------|-------------------|------------------------|-------------------|
|                  | N (%)             | N (%)                  | N (%)             |
| Birth year       |                   |                        |                   |
| 1940-1979        | 51 (55%)          | 53 (58%)               | 104 (57%)         |
| 1980-1999        | 41 (45%)          | 39 (42%)               | 80 (43%)          |
| Gender           |                   |                        |                   |
| Male/F-M Trans   | 43 (47%)          | 45 (49%)               | 88 (48%)          |
| Female/M-F Trans | 47 (51%)          | 47 (51%)               | 94 (51%)          |
| Other            | 2 (2%)            | 0 (0%)                 | 2 (1%)            |
| <b>Total</b>     | <b>92 (100%)</b>  | <b>92 (100%)</b>       | <b>184 (100%)</b> |

## Missing Data

The empowerment primary outcome had the following missing data: 6, 7, 2, 2, and 4 observations were missing from each subscale respectively (Table 3) with 12 (6.5%) missing from total score. No imputation was used. The INSPIRE scale had 1 missing in the support subscale after single imputation and 2 missing in relationship subscale (no imputation), while the QOLI20 had 1 missing in social subscale after single imputation. All other secondary outcomes had no missing data.
